# Supplementary material for: Gelation of the genome by topoisomerase II targeting anticancer agents
Source: Royal Society of Chemistry journal article supplement (doi:10.1039/c2sm27229f), 2012-12-12
Supplement: c2sm27229f.pdf [file c2sm27229f.pdf]

## Supplementary Information: Gelation of the genome by topoisomerase II targeting anticancer agents

Yun Soo Kim,<sup>1,2</sup> Binu Kundukad,<sup>2</sup> Abdollah Allahverdi,<sup>3</sup>  
Lars Nordensköld,<sup>3</sup> Patrick S. Doyle,<sup>2,4</sup> and Johan R. C. van der Maarel<sup>2,5</sup>

<sup>1</sup>*School of Chemical and Biological Engineering,  
Seoul National University, Republic of Korea*

<sup>2</sup>*BioSystems and Micromechanics (BioSyM) IRG,  
Singapore - MIT Alliance for Research and Technology (SMART) Centre, Singapore*

<sup>3</sup>*Nanyang Technological University, School of Biological Sciences, Singapore, 63755*

<sup>4</sup>*Department of Chemical Engineering,  
Massachusetts Institute of Technology, Cambridge,  
Massachusetts 02139, United States of America*

<sup>5</sup>*Department of Physics, National University of Singapore, Singapore 117542*

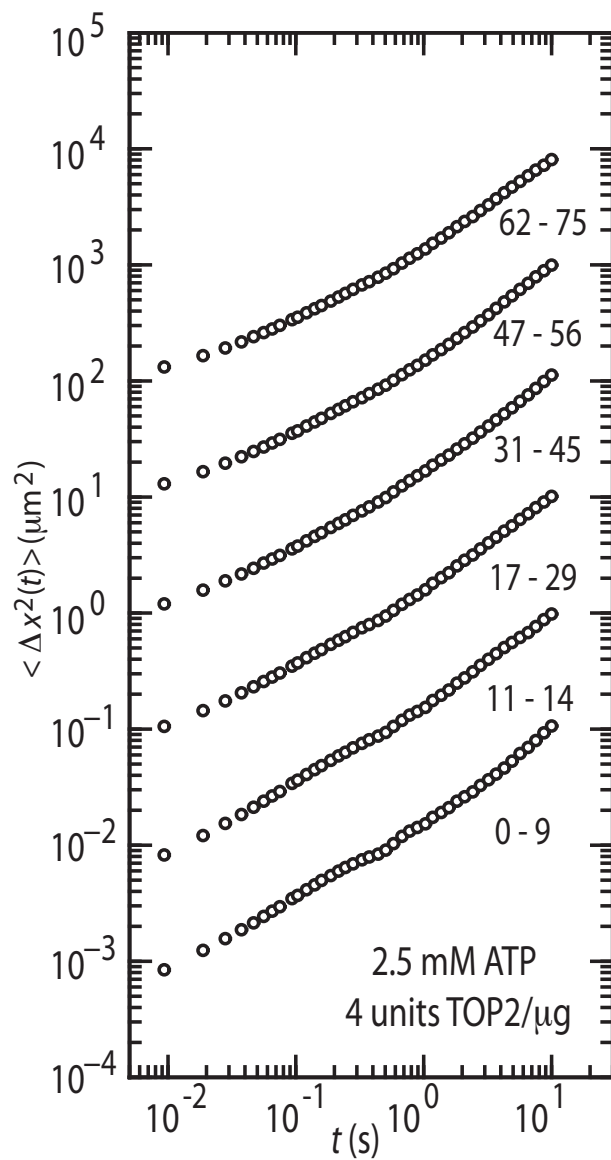

FIG. 1. Time evolution of the mean square displacement  $\langle \Delta x^2(t) \rangle$  after the addition of TOP2 to a solution of 1.6 g of cosmid/L with 2.5 mM ATP (AMP-PNP-free). The TOP2 concentration is 4 units per  $\mu\text{g}$  of DNA. Time intervals are indicated in min. The data are shifted with a multiplicative factor 10 along the  $y$ -axis to avoid overlap.

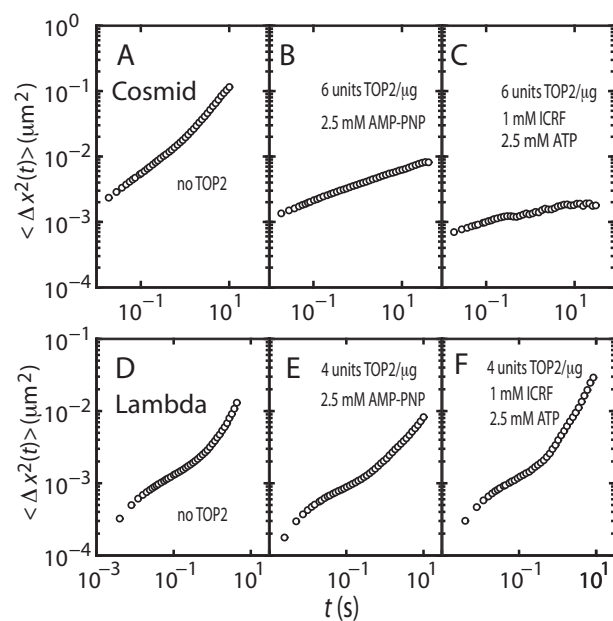

FIG. 2. (A-C) Mean square displacement  $\langle \Delta x^2(t) \rangle$  for a solution of 1.6 g of cosmid/L. (A) No added TOP2; (B) 6 units of TOP2/ $\mu\text{g}$  and 2.5 mM AMP-PNP; (C) 6 units of TOP2/ $\mu\text{g}$ , 2.5 mM ATP, and 1 mM ICRF. (D-F) As in panels (A-C), but for 1.0 g of  $\lambda$ -DNA/L. (D) No added TOP2; (E) 4 units of TOP2/ $\mu\text{g}$  and 2.5 mM AMP-PNP; (F) 4 units of TOP2/ $\mu\text{g}$ , 2.5 mM ATP, and 1 mM ICRF. The samples are incubated at 310 K for an 1 h after addition of TOP2.
